# Supplementary material
Source: publisher figshare collection journal article supplement (https://karger.figshare.com/ndownloader/files/13850654)
Supplement: Supplementary file 1 [file 13850654]

## **Supplementary Material**

# **Shikimic Acid Inhibits Osteoclastogenesis in Vivo and in Vitro by Blocking RANK/TRAF6 Association and Suppressing NF- $\kappa$ B and MAPK Signaling Pathways**

Xiao Chen<sup>a,c</sup> Xiaoqun Li<sup>b</sup> Xiao Zhai<sup>a</sup> Xin Zhi<sup>b</sup> Liehu Cao<sup>a,c</sup> Longjuan Qin<sup>d</sup>  
Jiacan Su<sup>a,c</sup>

<sup>a</sup>Department of Orthopedics, Shanghai Changhai Hospital, Second Military Medical University, Shanghai, <sup>b</sup>Graduate Management Unit, Shanghai Changhai Hospital, Second Military Medical University, Shanghai, <sup>c</sup>China-South Korea Bioengineering Center, Shanghai, <sup>d</sup>Orthopedic Basic and Translational Research Center, Jiangyin, China

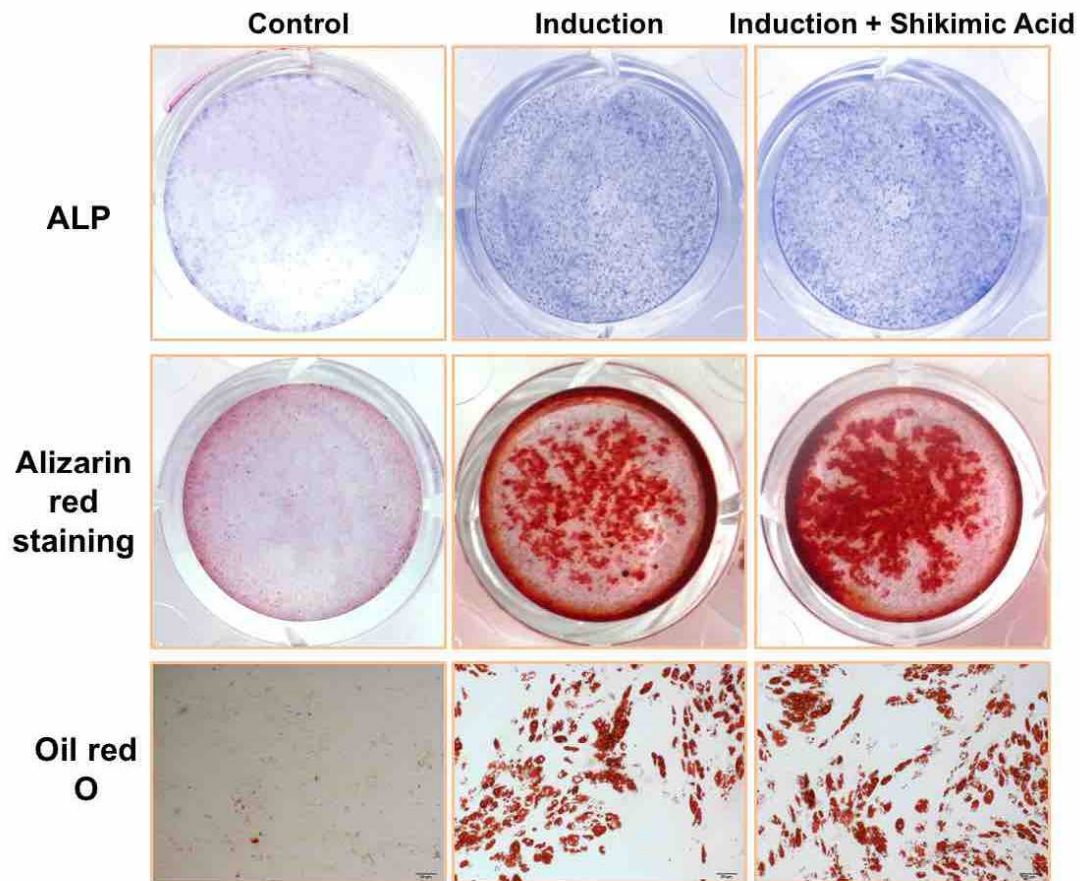

**Supplementary Figure 1** Shikimic acid had limited effect on the function of osteoblasts and formation of fat granules

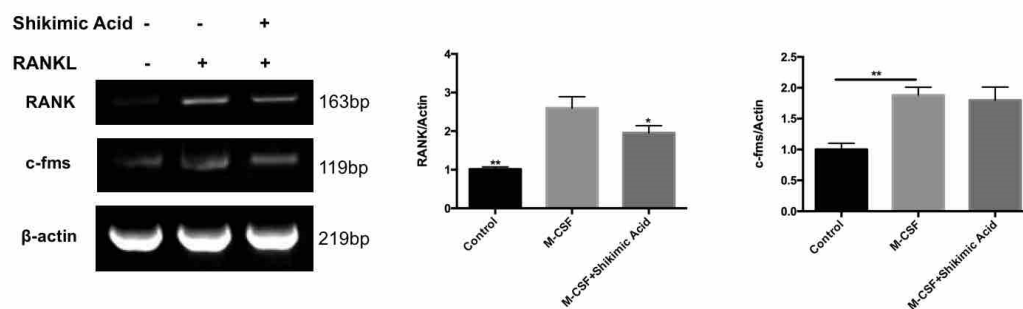

**Supplementary Figure 2** Shikimic acid had limited effect on BMM proliferation induced by M-CSF
